# Supplementary material
Source: publisher site journal article supplement (https://www.dovepress.com/article/309062)
Supplement: Supplementary file 1 [file get_supplementary_file.php]

Tumor Microenvironment-Modulated Nanozymes for NIR-II-Triggered Hyperthermia Enhanced Photo-Nanocatalytic Therapy via Disrupting ROS Homeostasis

Lipeng Zhu1, Yunlu Dai1, Lizeng Gao2, Qi Zhao1

1Cancer Centre, Faculty of Health Sciences, University of Macau, Macau SAR 999078, China.

2Institute of Biophysics, Chinese Academy of Science, China.

Figure S1. TEM images of PCCNs. Scale bar: 10 nm.

Figure S2. Size of PCCNs in water by DLS measurement.

Figure S3. A selected area electron diffraction (SAED) image of PCCNs.

Figure S4. XPS spectra of Cu in PCCNs.

Figure S5. UV-vis absorbance spectra of aqueous solution of PCCNs.

**Calculation of the photothermal conversion efficiency.** The photothermal conversion efficiency of the PCCNs was determined according to the previous method.[1](#_ENREF_1), [2](#_ENREF_2) The η value was calculated as follows:

where h is the heat transfer coefficient, S is the surface area of the container, Tmax and Tsurr are the equilibrium temperature and ambient temperature, respectively. Q0 is the heat associated with the light absorbance of the solvent, Aλ is the absorbance of the PCCNs at 1064 nm, and I is the laser power density.

According the formula:

Where τs is the time constant of the sample system, md and Cd are the mass of water and the heat capacity, respectively.

Figure S6. (A) The photothermal response of PCCNs with laser irradiation, and then the laser was shut off. (B) The linear time data versus -Ln(θ) obtained from the cooling period of (A).

According to Figure S6, τs was determined and calculated to be 142.56 s.

Thus, substituting according values of each parameters into

So the photothermal conversion efficiency (η) of PCCNs could be calculated to be 44.69 %.

Figure S7. The Michaelis–Menten kinetics plot of the PCCNs.

Figure S8. Relative viability of HUVECs and 4T1 cells with PCCNs treatment in different time. The differences among groups were calculated using Student's t-test. Data are presented as the mean ± standard error of the mean. *p < 0.05, **p < 0.01, ***p < 0.001.

Figure S9. The PAI value of PCCNs at various concentrations.

Figure S10. Biodistribution of Cu content in PCCNs determined by ICP-MS.

Figure S11. Tumor inhibition rate of mice treated with (b) PCCNs, (c) PCCNs + 660 nm laser, (d) PCCNs + 1064 nm laser, and (e) PCCNs + 660 + 1064 nm laser. The differences among groups were calculated using Student's t-test. Data are presented as the mean ± standard error of the mean. *p < 0.05, **p < 0.01, ***p < 0.001.

Figure S12. Tumor weight of mice treated with (a) PBS, (b) PCCNs, (c) PCCNs + 660 nm laser, (d) PCCNs + 1064 nm laser, and (e) PCCNs + 660 + 1064 nm laser. The differences among groups were calculated using Student's t-test. Data are presented as the mean ± standard error of the mean. *p < 0.05, **p < 0.01, ***p < 0.001.

Table S1. FT-IR data of Ce6, PEG and PCCNs.

| **Functional group** | **Ce6** (cm−1) | **PEG** (cm−1) | **PCCNs** (cm−1) |
| --- | --- | --- | --- |
| -OH  C=O  C-O-C  -CH  C=C  C-N  C=N | 3425  1712  -  -  1603  1238  1434 | -  -  1111,1280,1242  2889,1467,1343,963,842  -  - | 3432  1707  1106,1281,1241  2886,1468,1343,964,843  1630  1229  1430 |

Table S2. Comparisons of the Michaelis-Menten constant (Km) and maximum reaction rate (*V*max) in different systems.

| **Catalyst** | **Substance** | ***Km (mM)*** | ***V*max (10-7 Ms-1)** |
| --- | --- | --- | --- |
| **PCCNs** | H2O2 | 14.29 | 4.63 |

**References**

1. Chang M, Wang M, Wang M, et al. A Multifunctional Cascade Bioreactor Based on Hollow-Structured Cu2MoS4 for Synergetic Cancer Chemo-Dynamic Therapy/Starvation Therapy/Phototherapy/Immunotherapy with Remarkably Enhanced Efficacy. Adv Mater. 2019;31(51):1905271. doi:10.1002/adma.201905271

2. Wu C, Wang S, Zhao J, et al. Biodegradable Fe(III)@WS2-PVP Nanocapsules for Redox Reaction and TME-Enhanced Nanocatalytic, Photothermal, and Chemotherapy. Adv Funct Mater. 2019;29(26):1901722. doi:10.1002/adfm.201901722
